# Supplementary material for: Effect of Six Lactic Acid Bacteria Strains on Physicochemical Characteristics, Antioxidant Activities and Sensory Properties of Fermented Orange Juices
Source: MDPI journal article supplement (doi:10.3390/foods11131920), 2022-06-28
Supplement: s1 [file s1]

## Supplementary Materials

**Table S1.** Pearson correlation coefficients of aroma-active compounds with OAV  $\geq 1$  and aroma flavors of the fermented orange juices and original orange juice (control).

| Compounds                | Ethyl acetate | Ethyl butyrate | Ethyl 3-hydroxyhexanoate | $\alpha$ -Pinene | $\beta$ -Myrcene | D-Limonene | 2-Carene | 3-Carene | Terpinolene | $\alpha$ -Terpinene |
|--------------------------|---------------|----------------|--------------------------|------------------|------------------|------------|----------|----------|-------------|---------------------|
| Ethyl butyrate           | -0.407        | 1              |                          |                  |                  |            |          |          |             |                     |
| Ethyl 3-hydroxyhexanoate | 0.067         | -0.236         | 1                        |                  |                  |            |          |          |             |                     |
| $\alpha$ -Pinene         | -0.152        | 0.877**        | -0.204                   | 1                |                  |            |          |          |             |                     |
| $\beta$ -Myrcene         | -0.003        | -0.101         | -0.596                   | 0.188            | 1                |            |          |          |             |                     |
| D-Limonene               | 0.226         | -0.771*        | -0.200                   | -0.585           | 0.647            | 1          |          |          |             |                     |
| 2-Carene                 | -0.111        | 0.273          | 0.584                    | 0.039            | -0.695           | -0.547     | 1        |          |             |                     |
| 3-Carene                 | 0.207         | 0.385          | -0.401                   | 0.320            | -0.134           | -0.493     | 0.178    | 1        |             |                     |
| Terpinolene              | -0.297        | -0.068         | 0.355                    | -0.287           | -0.685           | -0.461     | 0.204    | 0.168    | 1           |                     |
| $\alpha$ -Terpinene      | -0.042        | 0.769*         | 0.066                    | 0.805*           | -0.180           | -0.774     | 0.483    | 0.630    | -0.002      | 1                   |
| <i>p</i> -Cymene         | -0.255        | 0.834*         | -0.156                   | 0.564            | -0.355           | -0.739     | 0.626    | 0.528    | -0.052      | 0.708               |
| Valencene                | 0.284         | -0.625         | 0.510                    | -0.555           | -0.343           | 0.228      | -0.237   | -0.543   | 0.425       | -0.605              |
| $\beta$ -Caryophyllene   | 0.105         | -0.223         | 0.614                    | -0.352           | -0.755*          | -0.402     | 0.587    | 0.324    | 0.762*      | 0.204               |
| $\beta$ -Humulene        | -0.167        | 0.898**        | 0.033                    | 0.884**          | -0.238           | -0.871*    | 0.408    | 0.516    | 0.054       | 0.951**             |
| $\gamma$ -Selinene       | 0.345         | -0.813*        | -0.244                   | -0.744           | 0.213            | 0.680      | -0.647   | -0.149   | 0.156       | -0.805              |
| Acetic acid              | -0.339        | 0.668          | -0.319                   | 0.420            | -0.104           | -0.502     | 0.545    | 0.640    | -0.094      | 0.646               |
| Linalool                 | -0.119        | 0.822*         | -0.035                   | 0.601            | -0.538           | -0.928**   | 0.571    | 0.651    | 0.222       | 0.799*              |
| (-)-4-Terpineol          | -0.146        | 0.828*         | 0.002                    | 0.627            | -0.546           | -0.959**   | 0.547    | 0.645    | 0.287       | 0.822*              |
| $\alpha$ -Terpineol      | -0.158        | 0.863*         | 0.102                    | 0.720            | -0.504           | -0.965**   | 0.559    | 0.544    | 0.223       | 0.876*              |
| Citronellol              | -0.093        | 0.750          | 0.278                    | 0.716            | -0.491           | -0.942**   | 0.514    | 0.491    | 0.310       | 0.902*              |
| Ethanol                  | -0.248        | 0.540          | -0.097                   | 0.304            | -0.574           | -0.824*    | 0.158    | 0.568    | 0.711       | 0.438               |
| 1-Octanol                | -0.379        | 0.820*         | 0.051                    | 0.706            | -0.355           | -0.911**   | 0.444    | 0.585    | 0.371       | 0.884*              |
| Carvone                  | -0.278        | -0.273         | 0.343                    | -0.645           | -0.660           | -0.042     | 0.306    | -0.383   | 0.534       | -0.532              |
| Nootkatone               | -0.406        | 0.385          | 0.358                    | 0.381            | -0.123           | -0.446     | 0.600    | 0.282    | 0.173       | 0.702               |
| (+)-Nootkatone           | 0.182         | -0.517         | 0.320                    | -0.557           | -0.433           | 0.090      | -0.276   | -0.347   | 0.603       | -0.589              |
| Hexanal                  | -0.167        | 0.898**        | 0.033                    | 0.884**          | -0.238           | -0.871*    | 0.408    | 0.516    | 0.054       | 0.951**             |
| Pentanal                 | -0.167        | -0.240         | -0.280                   | -0.104           | 0.555            | 0.372      | -0.206   | 0.290    | -0.047      | 0.050               |
| (Z)-citral               | -0.279        | -0.453         | 0.809*                   | -0.462           | -0.345           | 0.087      | 0.323    | -0.493   | 0.514       | -0.227              |
| Aroma flavors            | 0.182         | 0.120          | 0.206                    | -0.035           | -0.742           | -0.667     | 0.322    | 0.626    | 0.775*      | 0.354               |

**Table S1.** (continued)

| Compounds              | p-Cym-ene | Valenc-ene | $\beta$ -Cary-ophylle-ne | $\beta$ -Humulene | $\gamma$ -Selin-ene | Acetic acid | Linalool | (-)-4-Terpi-neol | $\alpha$ -Terpi-neol | Citronellol |
|------------------------|-----------|------------|--------------------------|-------------------|---------------------|-------------|----------|------------------|----------------------|-------------|
| Valencene              | -0.694    | 1          |                          |                   |                     |             |          |                  |                      |             |
| $\beta$ -Caryophyllene | 0.035     | 0.282      | 1                        |                   |                     |             |          |                  |                      |             |
| $\beta$ -Humulene      | 0.751     | -0.517     | 0.087                    | 1                 |                     |             |          |                  |                      |             |
| $\gamma$ -Selinene     | -0.771*   | 0.569      | 0.011                    | -0.838*           | 1                   |             |          |                  |                      |             |
| Acetic acid            | 0.885*    | -0.891*    | 0.054                    | 0.584             | -0.627              | 1           |          |                  |                      |             |
| Linalool               | 0.909*    | -0.468     | 0.260                    | 0.859*            | -0.691              | 0.717       | 1        |                  |                      |             |
| (-)-4-Terpineol        | 0.869*    | -0.429     | 0.295                    | 0.888*            | -0.693              | 0.674       | 0.994**  | 1                |                      |             |
| $\alpha$ -Terpineol    | 0.841*    | -0.414     | 0.250                    | 0.947*            | -0.791*             | 0.619       | 0.965**  | 0.981**          | 1                    |             |
| Citronellol            | 0.648     | -0.268     | 0.371                    | 0.944*            | -0.751              | 0.438       | 0.853*   | 0.896**          | 0.950**              | 1           |
| Ethanol                | 0.473     | -0.030     | 0.407                    | 0.566             | -0.192              | 0.315       | 0.735    | 0.777*           | 0.703                | 0.666       |
| 1-Octanol              | 0.707     | -0.480     | 0.314                    | 0.921*            | -0.728              | 0.631       | 0.846*   | 0.891**          | 0.911**              | 0.920**     |
| Carvone                | -0.023    | 0.509      | 0.350                    | -0.410            | 0.227               | -0.160      | -0.038   | -0.058           | -0.133               | -0.232      |
| Nootkatone             | 0.391     | -0.510     | 0.412                    | 0.570             | -0.682              | 0.547       | 0.369    | 0.407            | 0.478                | 0.576       |
| (+)-Nootkatone         | -0.568    | 0.941**    | 0.329                    | -0.465            | 0.629               | -0.759*     | -0.309   | -0.270           | -0.309               | -0.217      |
| Hexanal                | 0.751     | -0.517     | 0.087                    | 1.000*            | -0.838*             | 0.584       | 0.859*   | 0.888**          | 0.947**              | 0.944**     |
| Pentanal               | -0.255    | -0.416     | 0.069                    | -0.167            | 0.197               | 0.204       | -0.338   | -0.317           | -0.339               | -0.248      |
| (Z)-citral             | -0.428    | 0.497      | 0.580                    | -0.279            | 0.048               | -0.371      | -0.366   | -0.312           | -0.248               | -0.057      |
| Aroma flavors          | 0.248     | 0.202      | 0.785*                   | 0.348             | 0.024               | 0.138       | 0.577    | 0.613            | 0.527                | 0.573       |

**Table S1.** (continued)

| Compounds      | Ethanol | 1-Octanol | Carvone | Nootka-t one | (+)-Nootka tone | Hexanal | Pentanal | (Z)-citral | Aroma flavors |
|----------------|---------|-----------|---------|--------------|-----------------|---------|----------|------------|---------------|
| 1-Octanol      | 0.735   | 1         |         |              |                 |         |          |            |               |
| Carvone        | 0.191   | -0.234    | 1       |              |                 |         |          |            |               |
| Nootkatone     | 0.12    | 0.682     | -0.294  | 1            |                 |         |          |            |               |
| (+)-Nootkatone | 0.242   | -0.354    | 0.606   | -0.571       | 1               |         |          |            |               |
| Hexanal        | 0.566   | 0.921**   | -0.41   | 0.57         | -0.465          | 1       |          |            |               |
| Pentanal       | -0.248  | 0.007     | -0.474  | 0.457        | -0.422          | -0.167  | 1        |            |               |
| (Z)-citral     | -0.16   | -0.083    | 0.421   | 0.395        | 0.364           | -0.279  | 0.146    | 1          |               |
| Aroma flavors  | 0.817*  | 0.52      | 0.225   | 0.126        | 0.395           | 0.348   | -0.166   | 0.065      | 1             |

\*Correlation is significant at  $p < 0.05$ . \*\*Correlation is extremely significant at  $p < 0.01$ .

**Table S2.** Pearson correlation coefficients of the physicochemical characteristics, viable counts and taste flavors of the fermented orange juices and original orange juice (control).

|                     | Viable<br>bacterias | Soluble<br>sugars | TA      | SSC          | pH           | SSC/TA<br>ratio | Organic<br>acids | Vc     | Total<br>flavones | Limo-<br>nin | Sweet-<br>ness | Sour-<br>ness |
|---------------------|---------------------|-------------------|---------|--------------|--------------|-----------------|------------------|--------|-------------------|--------------|----------------|---------------|
| Viable<br>bacterias | 1                   |                   |         |              |              |                 |                  |        |                   |              |                |               |
| Soluble<br>sugars   | -0.949**            | 1                 |         |              |              |                 |                  |        |                   |              |                |               |
| TA                  | 0.548               | -0.335            | 1       |              |              |                 |                  |        |                   |              |                |               |
| SSC                 | -0.955**            | 0.961**           | -0.509  | 1            |              |                 |                  |        |                   |              |                |               |
| pH                  | -0.954**            | 0.906**           | -0.532  | 0.922**      | 1            |                 |                  |        |                   |              |                |               |
| SSC/TA<br>ratio     | -0.890*             | 0.760*            | -0.863* | 0.864*       | 0.863*       | 1               |                  |        |                   |              |                |               |
| Organic<br>acids    | 0.869*              | -0.690            | 0.865*  | -0.792*      | -0.852*      | -0.973**        | 1                |        |                   |              |                |               |
| Vc                  | 0.255               | -0.430            | -0.597  | -0.216       | -0.162       | 0.177           | -0.221           | 1      |                   |              |                |               |
| Total<br>flavones   | -0.574              | 0.762*            | 0.301   | 0.593        | 0.593        | 0.194           | -0.144           | -0.733 | 1                 |              |                |               |
| Limonin             | -0.747              | 0.808*            | -0.151  | 0.682        | 0.654        | 0.510           | -0.505           | -0.435 | 0.766*            | 1            |                |               |
| Sweetness           | -0.659              | 0.480             | -0.781* | 0.588        | 0.767*       | 0.818*          | -0.836*          | 0.286  | 0.018             | 0.127        | 1              |               |
| Sourness            | 0.917**             | -0.800*           | 0.810*  | -0.893*<br>* | -0.904*<br>* | -0.986**        | 0.974**          | -0.150 | -0.288            | -0.590       | -0.784<br>*    | 1             |

SSC/TA ratio: soluble solid content/ total acid content ratio. \*Correlation is significant at  $p < 0.05$ . \*\*Correlation is extremely significant at  $p < 0.01$ .
